# Supplementary material
Source: ML conference proceedings conference paper supplement (https://www.ecva.net/papers/eccv_2024/papers_ECCV/html/2711_ECCV_2024_paper.php)
Supplement: Supplementary file 1 [file 02711-supp.pdf]

## Appendix

### A Implementation Details

**For training datasets**, we follow LISA to utilize a combination of datasets for semantic segmentation, COCO-Stuff, PACO-LVIS, PASCAL-Part, and Mapillary Vistas), referring segmentation(refCLEF, refCOCO, refCOCO+, and refCOCOg), and the ReasonSeg training set for fine-tuning. We abandon using the visual question answering (LLaVA-Instruct-150k) dataset employed by the baseline method LISA. The rationale lies in CoReS’s control over the chain-of-reasoning process through the fixed templates of LLM output formats. The textual outputs from the VQA dataset, which may conflict with the logic of template-based outputs and fine-grained tasks, could adversely affect the training process.

**For the test dataset**, we conduct experiments on the ReasonSeg. It comprises image-question pairs with reasoning difficulty and the ground truth segmentation masks. Its training and validation set includes 239 and 200 image-instruction pairs, respectively.

As for the LoRA tuning of the MLLM, the LoRA rank is set to 8 and the LoRA alpha and dropout are set to 16 and 0.05, respectively. We apply deepspeed as the code engine, with 8 NVIDIA A100 for training. The optimizer for CoReS is AdamW and its learning rate is set to 0.0003, with a 100-step warm-up-decay.

### B Ablation Experiments

As for different design alternatives of CoReS, we conduct experiments in Tab.S1. **Text-Only CoT**: We first compare with a CoT-version of LISA which performs explicit text-form reasoning before segmentation, which is trained with the additional text generated by GPT as supervision. This Text-Only CoT decreases the performance of LISA. One possible reason is that textual outputs weaken the info in [SEG], consequently impacting the subsequent segmentation process. **Supervised C1**, we choose two ways to provide supervision for C1, ①‘C1-GT’ is using the final mask for C1 loss calculation at a low weight scale. The decrease in performance can be attributed to the undermining of the CoT formation, regardless of weight differences. ②‘Pseudo’ refers to generating larger masks as C1 gt. It can be observed that leading MLLM to generate without constraints is better than rigid constraints. **Query-Specific Textual Prompts**: We adopt query-specific textual prompts (instead of irrelevant prompts) as inputs. Although it may not be practical in applications due to time and cost considerations, the improvement, as a rough upper bound, indirectly validates the effectiveness of in-context input.

We conduct experiments on the hyperparameters in Tab.S2. Placing excessive emphasis on the reasoning chain loss leads to a decrease in model performance. This is because it merely serves as an implicit constraint on the output of intermediate text, while the ultimate segmentation chain loss deserves more

**Table S1:** Implementation strategies of CoT. ‘LISACoT’ refers to the text-only version of CoT, and ‘relevant’ refers to using the trained CoReS-7B with query-related prompts generated by GPT. ‘C1-GT’ and ‘pseudo’ are the above two C1 supervisions.

| Metric | CoReS | LISA | LISACoT | relevant | C1-GT | pseudo |
|--------|-------|------|---------|----------|-------|--------|
| gIoU   | 59.4  | 52.9 | 44.7    | 60.1     | 55.9  | 58.1   |
| cIoU   | 62.1  | 54.0 | 45.9    | 62.8     | 55.8  | 62.1   |

attention. Furthermore, increasing the weight of the DICE loss also has a positive effect on the results, which aligns with empirical intuition.

**Table S2:** Hyperparameters analysis of loss weights.

| Hyper-param | $\lambda_{COS}/\lambda_{COR}$ |      |      | $\lambda_{CE}/\lambda_{DICE}$ |             |             |
|-------------|-------------------------------|------|------|-------------------------------|-------------|-------------|
|             | 2:1                           | 1:1  | 1:2  | 4:1                           | 3:2         | 2:3         |
| gIoU        | <b>59.4</b>                   | 58.8 | 55.5 | 57.6                          | 59.0        | <b>59.4</b> |
| cIoU        | <b>62.1</b>                   | 61.1 | 58.3 | 62.2                          | <b>66.2</b> | 62.1        |

We use gIoU as our primary metric, rather than the cIoU with a bias towards large-area targets. To clarify, we divide target objects based on their sizes, as shown in Tab.B. cIoU is dominated by the performance on large objects, which dilutes the segmentation advantage of CoReS on more challenging small targets.

**Table S3:** Ablation of different metrics. **Table S4:** Performance comparison ‘ $cIoU_s$ ’, ‘ $cIoU_m$ ’ and ‘ $cIoU_l$ ’ refer to cIoU on part segmentation datasets. ‘PIN’, of objects with small, medium, and large ‘PP’, and ‘RP’ are PartImageNet, PascalPart, and ReasonPart, respectively.

| Method | LLaVA-v1.5-13B |             |             |             |             | Method | PIN         | PP          | RP          |             |
|--------|----------------|-------------|-------------|-------------|-------------|--------|-------------|-------------|-------------|-------------|
|        | gIoU           | cIoU        | $cIoU_s$    | $cIoU_m$    | $cIoU_l$    |        | mIoU        | mIoU        | gIoU        | cIoU        |
| LISA   | 65.0           | 67.8        | 22.4        | 53.6        | 78.7        | LISA   | 33.3        | 14.8        | 14.1        | 18.9        |
| CoReS  | <b>68.1</b>    | <b>68.2</b> | <b>35.7</b> | <b>58.5</b> | <b>80.5</b> | CoReS  | <b>39.0</b> | <b>19.6</b> | <b>20.9</b> | <b>33.1</b> |

## C Experiments on other benchmarks

Additionally, we evaluate the ability of CoReS on general fine-grained segmentation datasets. The mean-intersection-over-union (mIoU) serves as the evaluation metric here. On PartImageNet, the zero-shot performance of CoReS shows a 5.7% improvement over LISA. Similarly, on the validation set of PascalPart, an approximate 5% enhancement is observed. These results demonstrate that the multimodal reasoning chain structure of CoReS not only elevates the un-

derstanding of reasoning tasks but also augments the capability to comprehend details in general dense visual tasks.

In addition, we construct two reasoning-based part segmentation benchmarks based on the aforementioned two component-level datasets. We employ in-context learning with chatGPT to generate questions about category names, yielding questions such as "In the oceanic scene, which functional feature aids fish in steering and maintaining stability in the currents?" ReasonPart is established on 2,957 validation set images from PartImageNet and 4,465 images from PascalPart. As Tab.S4 indicates, on the challenging benchmark ReasonPart, which features complex queries and fine-grained segmentation parts, CoReS outperforms LISA by 6.8% in terms of gIoU and approximately 15% in cIoU, substantiating the efficacy of its dual-chain structure.

## D Analysis of C1 masks

Obtaining mask annotations for intermediate logical layers is impractical due to the logic subjectivity, so MLLM with world knowledge is used for a unified unsupervised representation. The scene-level info-injection of C1 is firstly based on MLLM’s in-context learning ability, where in-context inputs are provided for logical prompts. Secondly, the MLLM’s semantically coherent and reasonable output helps the formation of the hierarchy. Supervised templates, like ‘It appears on [LOC],’ constrain the output semantics after ‘appears on’ naturally carry the scene-level or item location meaning. Thirdly, since a rough mask is required as SAM input, the gradient backpropagation also pushes [LOC] toward the scene-level info.

## E Quantitative Results

Qualitative results also prove the effectiveness of CoReS in Fig.S2 and Fig.S1. When facing complex reasoning problems, LISA exhibits errors in grounding the exact instance referred by the reasoning query, while CoReS achieves the correct answers. Whether it’s objects that are difficult to segment, such as a fork inserted into rice, or challenging reasoning tasks like determining the source of power for carts in an image, the chain-like hierarchy of CoReS results in correct and fine-grained segmentation.

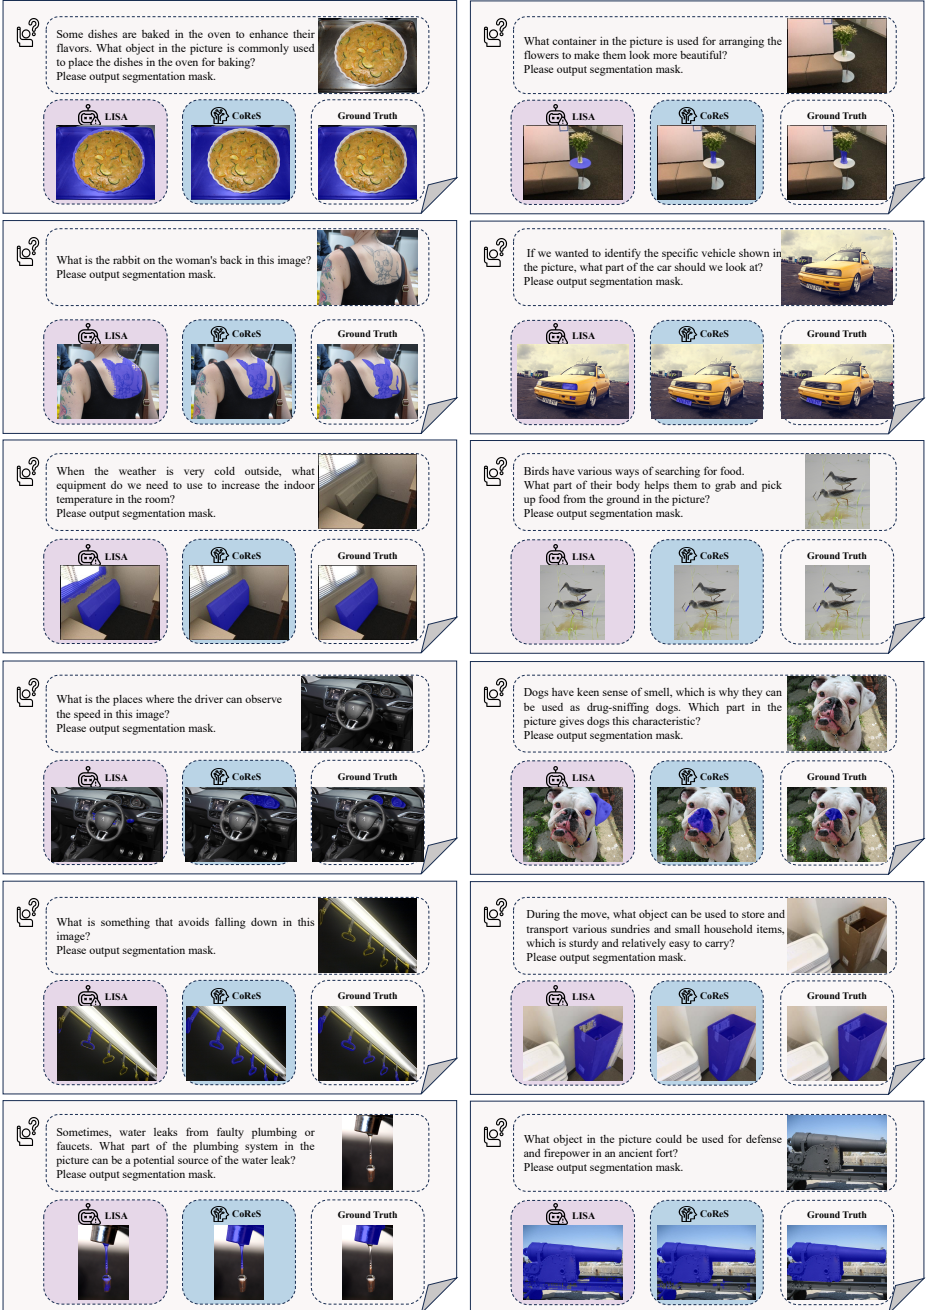

Fig. S1: Visual comparison of CoReS and LISA.



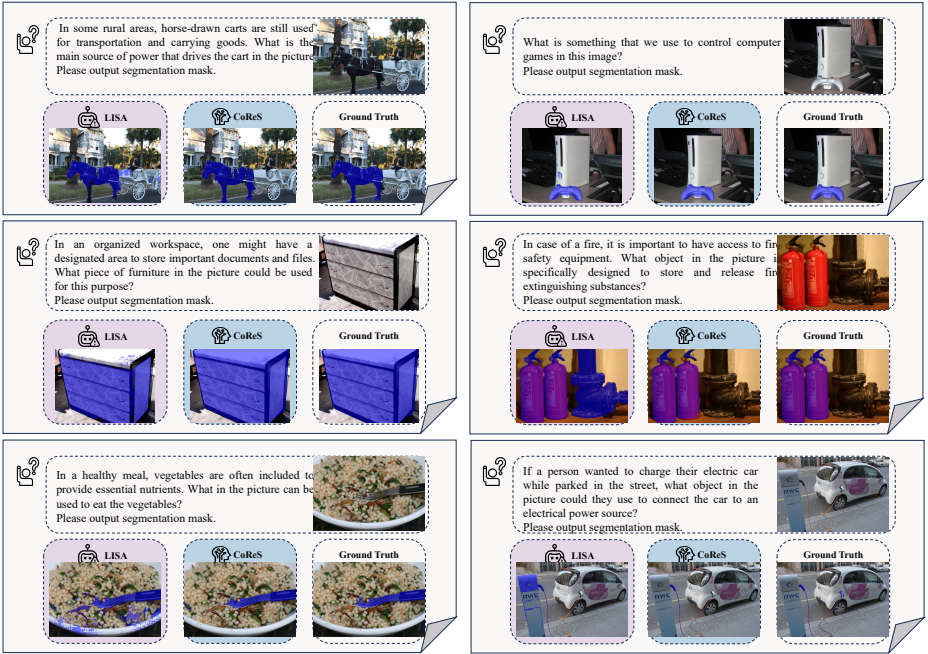

**Fig. S2:** Visual comparison of CoReS and LISA.
